# Supplementary material for: Molecular modelling and site-directed mutagenesis provide insight into saccharide pyruvylation by the Paenibacillus alvei CsaB enzyme
Source: PubMed Central journal article supplement (PMC10435577; doi:10.1038/s41598-023-40072-1), 2023-08-17

## Supplementary Information

### **Molecular modelling and site-directed mutagenesis provide insight into saccharide pyruvylation by the *Paenibacillus alvei* CsaB enzyme**

**Cordula Stefanović, Fiona F. Hager-Mair, Erik Breslmayr, Arturo López-Guzmán, Charlie Lim, Markus Blaukopf, Paul Kosma, Chris Oostenbrink, Roland Ludwig & Christina Schäffer**

Supplementary Tables S1-S2

Supplementary Figures S1-S15

References

Original images (SDS-PAGE gels) for assembly of Supplementary Figure S5

## Supplementary Tables

**Table S1.** Secondary structure assignment using DSSP in PyMol showing the Y14F, H308S and K328R CsaB variants in comparison to the CsaB wild-type enzyme (WT). H, helix; G, 3-turn helix (3<sub>10</sub> helix); I, p-helix; E, extended strand; B, residue in isolated  $\beta$ -bridge; S, bend; T, H-bonded turn; C, coil; T, no secondary structure recognized. Differences in the predicted loop 2 (residues 180-193) of the variants compared to the WT are written in red.

| Enzyme | Secondary structure content |             |            |            |            |
|--------|-----------------------------|-------------|------------|------------|------------|
| WT     | ccccceeeee                  | eeeesscchh  | hhhhhhhhhh | hhhhhhhhht | ccEEEEEEES |
| K328R  | ccccceeeee                  | eeeessscchh | hhhhhhhhhh | hhhhhhhhht | ccEEEEEEES |
| H308S  | ccccceeeee                  | eeeessscchh | hhhhhhhhhh | hhhhhhhhht | ccEEEEEEES |
| Y14F   | ccccceeeee                  | eeeessscchh | hhhhhhhhhh | hhhhhhhhht | ccEEEEEEES |
|        | 1                           | 11          | 21         | 31         | 41         |
| WT     | shhhhhhhhs                  | seeeettcchh | hhhhhhhhcS | eeeeCS     | cSSScTTHHH |
| K328R  | shhhhhhhhs                  | seeeettcchh | hhhhhhhhcS | eeeeCS     | cSSScTTHHH |
| H308S  | shhhhhhhhs                  | seeeettcchh | hhhhhhhhcS | eeeeCS     | cSSScTTHHH |
| Y14F   | shhhhhhhhs                  | seeeettcchh | hhhhhhhhcS | eeeeESSScB | cSSScTTHHH |
|        | 51                          | 61          | 71         | 81         | 91         |
| WT     | hhhhhhhhhh                  | HTTccEEEE   | EEeccccGG  | GHHHHHHHT  | TSSEEEESSH |
| K328R  | hhhhhhhhhh                  | HTTccEEEE   | EEeccccGG  | GHHHHHHHT  | TcSEEEESSH |
| H308S  | hhhhhhhhhh                  | HTTccEEEE   | EEeccccGG  | GHHHHHHHT  | TcSEEEESSH |
| Y14F   | hhhhhhhhhh                  | HTTccEEEE   | EcBccccGG  | GHHHHHHHT  | TSSEEEESSH |
|        | 101                         | 111         | 121        | 131        | 141        |
| WT     | hhhhhhhhht                  | ccGGGcEEcc  | cGGGccccT  | TTSccccCS  | STTBcTTScB |
| K328R  | hhhhhhhhht                  | ccGGGcEEcc  | cGGGccccS  | STTSccSScS | SSSBcTTScB |
| H308S  | hhhhhhhhht                  | ccGGGcEEcc  | cGGGccccH  | HHHcccTTcT | TTTBcTTScB |
| Y14F   | hhhhhhhhht                  | ccGGGcEEcc  | cGGGccccT  | TSccccCS   | STTBcTTScB |
|        | 151                         | 161         | 171        | 181        | 191        |
| WT     | EEEEccccS                   | TTcHHHHHH   | HHHHHHHHHS | ccEEEEccSS | HHHHHHHHH  |
| K328R  | EEEEccccS                   | TTcHHHHHH   | HHHHHHHHHS | ccEEEEccSS | HHHHHHHHH  |
| H308S  | EEEEccccS                   | TTcHHHHHH   | HHHHHHHHHS | ccEEEEccSS | HHHHHHHHH  |
| Y14F   | EEEEccccS                   | TTcHHHHHH   | HHHHHHHHHS | ccEEEEccSS | HHHHHHHHH  |
|        | 201                         | 211         | 221        | 231        | 241        |
| WT     | HHHHHTTTSc                  | BcTTSScccc  | ccTTScceEE | EEccccSSH  | HHHHHHHTcS |
| K328R  | HHHHHHHSc                   | TTTScBSSc   | TTccSSScEE | EEccccSSH  | HHHHHHHTcS |
| H308S  | HHHHHTTTSc                  | BcTTSSSc    | ccccSSScEE | EEccccSSH  | HHHHHHHTcS |
| Y14F   | HHHHHTTTSc                  | BcTTSSSc    | ccccSSScEE | EEccccSSH  | HHHHHHHTcS |
|        | 251                         | 261         | 271        | 281        | 291        |

|       |            |            |            |            |            |
|-------|------------|------------|------------|------------|------------|
| WT    | EEEESSHHHH | HHHHHTTccE | EEEESSHHHH | HHHHHTTccc | SEETTBccHH |
| K328R | EEEESSHHHH | HHHHHTTccE | EEEESSHHHH | HHHHHTTccc | SEETTBccHH |
| H308S | EEEESSHHHH | HHHHHTTccE | EEEESSHHHH | HHHHHTTccc | SEETTBccHH |
| Y14F  | EEEESSHHHH | HHHHHTTccE | EEEESSHHHH | HHHHHTTccc | SEETTBccHH |
|       | 301        | 311        | 321        | 331        | 341        |
| WT    | HHHHHHHHHH | HTHHHHHHHH | HHHHHHHHHH | HHHHHHHHHH | HHHHHc     |
| K328R | HHHHHHHHHH | HTHHHHHHHH | HHHHHHHHHH | HHHHHHHHHH | HHHHHc     |
| H308S | HHHHHHHHHH | HTHHHHHHHH | HHHHHHHHHH | HHHHHHHHHH | HHHHHc     |
| Y14F  | HHHHHHHHHH | HTHHHHHHHH | HHHHHHHHHH | HHHHHHHHHH | HHHHHc     |
|       | 351        | 361        | 371        | 381        | 391        |

**Table S2.** Oligonucleotide primers used in this study. Mutated base triplets are colored in red.

| Primer        | Sequence                                           |
|---------------|----------------------------------------------------|
| Y14F_fwd1.8   | GTA CTT TCC GGA TAT <b>TTC</b> GGA TTC AAT AAT AGT |
| Y14F_rev1.8   | ACT ATT ATT GAA TCC <b>GAA</b> ATA TCC GGA AAG TAC |
| F16R_fwd0.2   | TCC GGA TAT TAC GGA <b>AGA</b> AAT AAT AGT GGT GAC |
| F16R_rev0.2   | GTC ACC ACT ATT ATT <b>TCT</b> TCC GTA ATA TCC GGA |
| F16A_fwd2.1   | TCC GGA TAT TAC GGA <b>GCA</b> AAT AAT AGT GGT GAC |
| F16A_rev2.1   | GTC ACC ACT ATT ATT <b>CGT</b> TCC GTA ATA TCC GGA |
| Fwd-R148Q-1.3 | GCGTATGTTTCGGTAC <b>CAAG</b> ATCGTGAGTCTGCA        |
| rev-R148Q-1.3 | TGCAGACTCACGATC <b>TTG</b> TACCGAAACATA            |
| Fwd-R148Q-2.9 | GCGTATGTTTCGGTAC <b>CAGG</b> ATCGTGAGTCTGCA        |
| rev-R148Q-2.9 | TGCAGACTCACGATC <b>CTG</b> TACCGAAACATA            |
| For-R148K-3.8 | GCGTATGTTTCGGTAAAAGATCGTGAGTCTGCA                  |
| rev-R148K-3.8 | TGCAGACTCACGATCCTTTACCGAAACATACGC                  |
| fwd-R207D-3.3 | GGCGTGTCCCTC <b>GAT</b> TTTTTGGGAATCAG             |
| rev-207D-3.3  | CTGATTCCAAAA <b>ATC</b> GAGGGACACGCC               |
| fwd-207D-2.3  | GGCGTGTCCCTC <b>GAC</b> TTTTTGGGAATCAG             |
| rev-207D-2.3  | CTGATTCCAAAA <b>GTC</b> GAGGGACACGCC               |
| Fwd-H308A-2.1 | GTTGGAATGCGATTG <b>GCA</b> TCCCTCATTATGCG          |
| rev-H308A-2.1 | CGCATAAATGAGGGAT <b>GGC</b> CAATCGCATTCCAAC        |
| fwd-H308A-2.3 | GTTGGAATGCGATTG <b>GCCT</b> CCTCATTATGCG           |
| rev-H308A-2.3 | CGCATAAATGAGGGAG <b>GGC</b> CAATCGCATTCCAAC        |
| For-H308R-2.2 | GTTGGAATGCGATTG <b>CGCT</b> CCTCATTATGCG           |
| Rev-H308R-2.2 | CGCATAAATGAGGGAG <b>GCG</b> CAATCGCATTCCAAC        |
| For-H308R-2.4 | GTTGGAATGCGATTG <b>CGT</b> TCCCTCATTATGCG          |
| Rev-H308R-2.4 | CGCATAAATGAGGGAA <b>ACG</b> CAATCGCATTCCAAC        |
| H308K_fwd1.2  | GTT GGA ATG CGA TTG <b>AAG</b> TCC CTC ATT TAT GCG |
| H308K_rev1.2  | CGC ATA AAT GAG GGA <b>CTT</b> CAA TCG CAT TCC AAC |
| H308S_fwd     | GTT GGA ATG CGA TTG <b>AGC</b> TCC CTC ATT TAT GCG |
| H308S_rev     | CGC ATA AAT GAG GGA <b>TCG</b> CAA TCG CAT TCC AAC |
| K328R_fwd0.2  | ATT TCT TAT GAT CCG <b>AGA</b> ATT GAT CAG TTT TTG |
| K328R_rev0.2  | CAA AAA CTG ATC AAT <b>TCT</b> CGG ATC ATA AGA AAT |

## Supplementary Figures

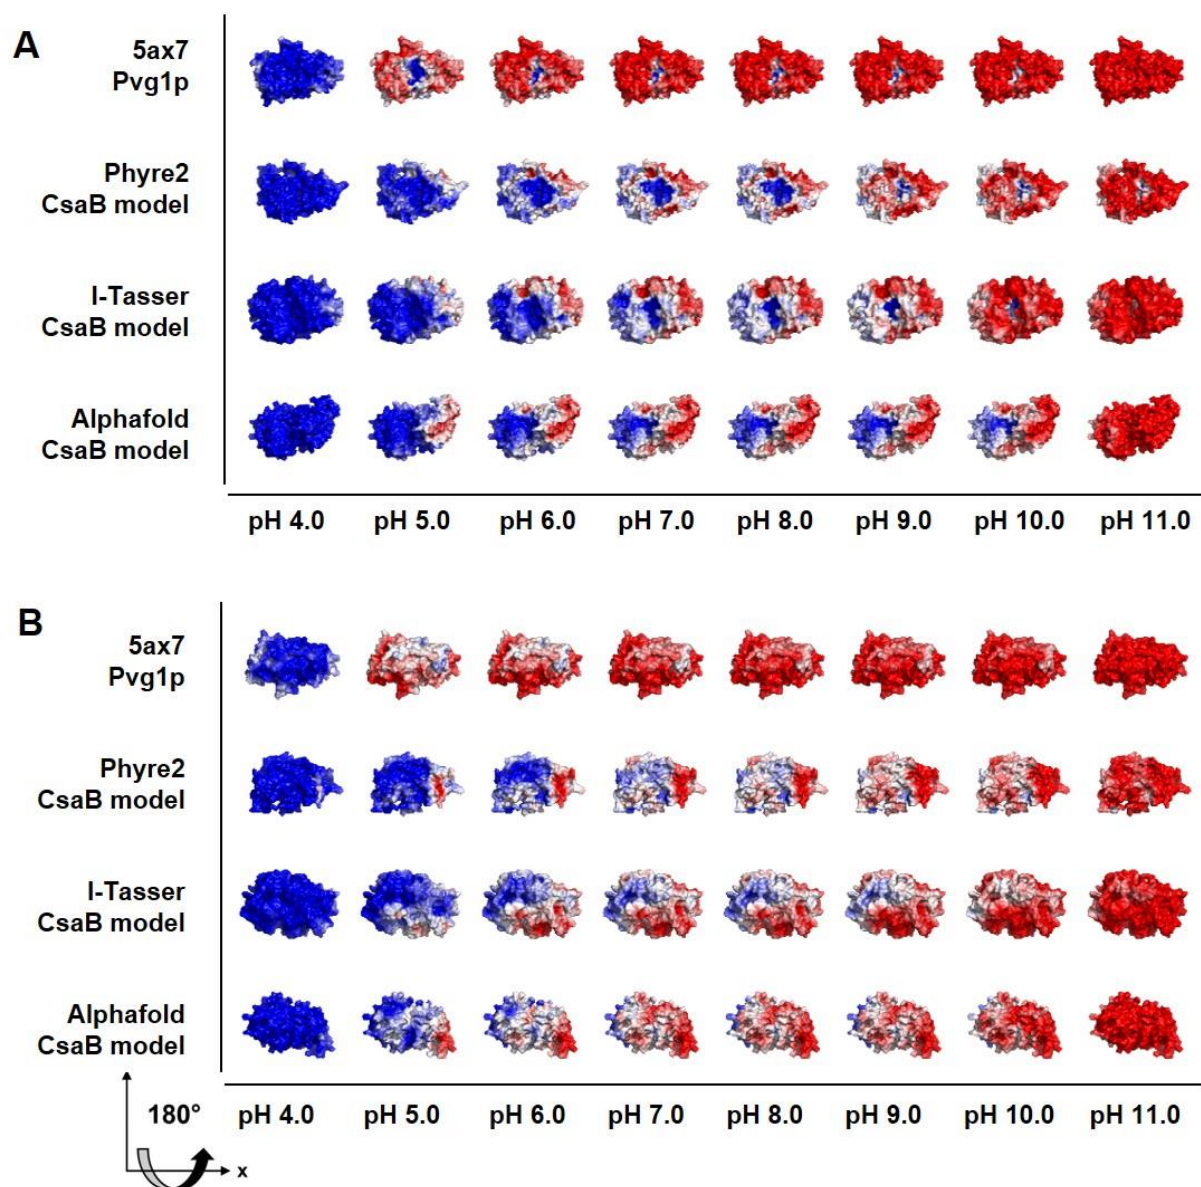

**Figure S1.** Surface electrostatics at pH 4, 5, 6, 7, 8, 9, 10, and 11 of Pvg1p from *S. pombe* (5ax7) in comparison to the models of CsaB from *P. alvei* (A); representations turned by 180° (B). Surface areas with a positive electrostatic potential ( $+5 RT/e$ ) are colored in blue, surface areas with a negative electrostatic potential ( $-5 RT/e$ ) in red. Surface electrostatics were calculated using pHmap (v1.2)<sup>1</sup>, which automatizes the usage of ABPS (v3)<sup>2</sup>, pdb2pqr (v2.1.1) (<https://www.poissonboltzmann.org/>) and PyMol (v2.4).

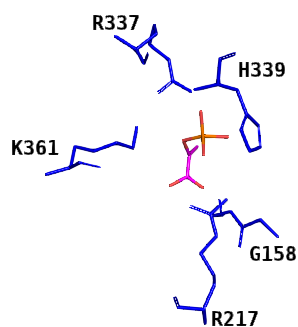

**Figure S2.** Zoomed-in view of the 5ax7 crystal structure of Pvg1p (blue) with docked PEP (magenta) to show PEP binding amino acids of Pvg1p, based on Higuchi *et al.*<sup>3</sup> (*i.e.*, R337 and R217 in Pvg1p) and on a docking study in analogy to the situation found in CsaB (this study; *i.e.*, R217, H339, K361, R337 and G159 in Pvg1p). The 5ax7 protein structure with docked substrate was visualized by PyMoL (Open Source Version 2.4; <https://github.com/schrodinger/pymol-open-source>).

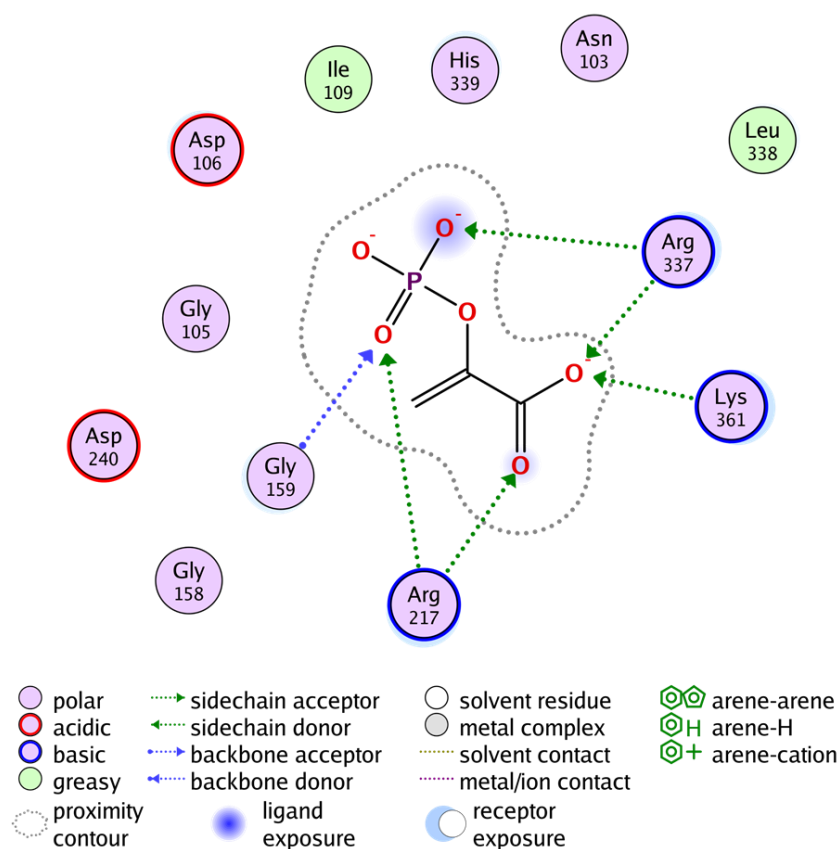

**Figure S3.** Ligand interaction diagram for the PEP donor docked to the binding site in the 5ax7 protein structure.

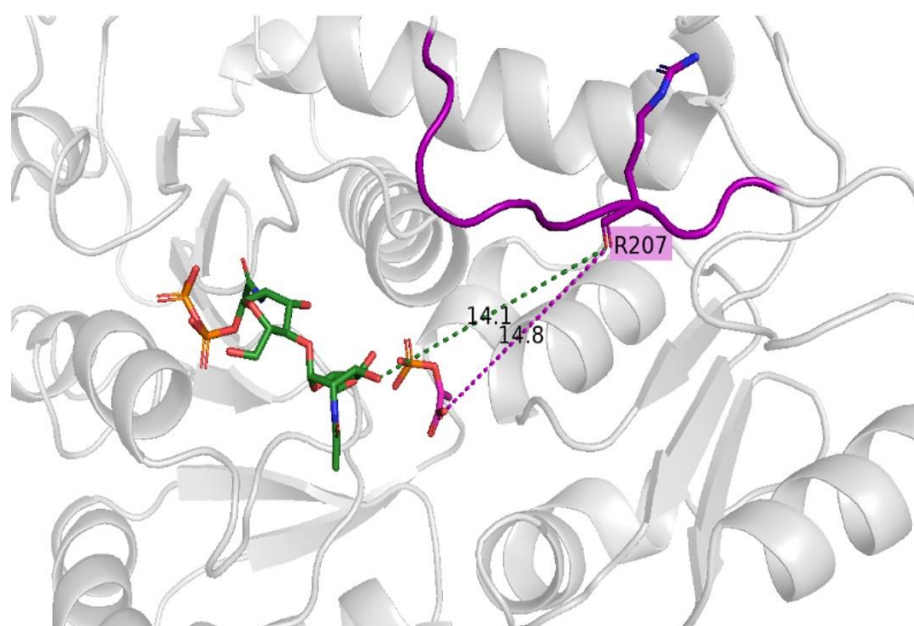

**Figure S4.** Enlarged view of “loop 1” (purple) in CsaB modelled by Phyre2 with docked substrates. The closest atom of PEP (magenta) to the conserved arginine residue R207 is at 14.8-Å distance (dotted line in magenta), the closest atom of the acceptor (green with phosphates in orange) to R207 is at 14.1-Å distance (dotted line in green). The CsaB protein structure with docked substrate was visualized by PyMoL (Open Source Version 2.4; <https://github.com/schrodinger/pymol-open-source>).

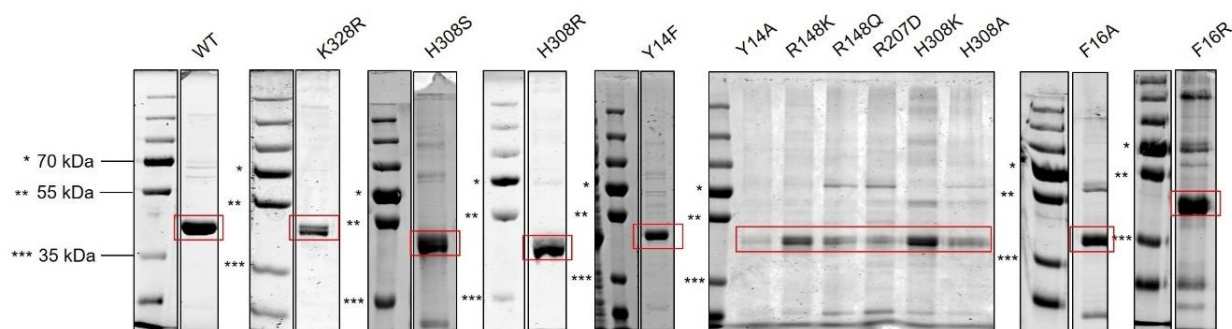

**Figure S5.** SDS-PAGE 10% gel of CsaB wild-type and variants upon Coomassie Brilliant Blue G250 staining after Ni-NTA purification. All recombinant enzymes (indicated in a red frame) are accompanied by a MW marker run on the same gel. Standard, PageRuler Prestained Plus (left). \*, 70 kDa, \*\*, 55 kDa, \*\*\*, 35 kDa. The original gels, from which the lanes were cropped are shown at the end of the Supplementary Information file.

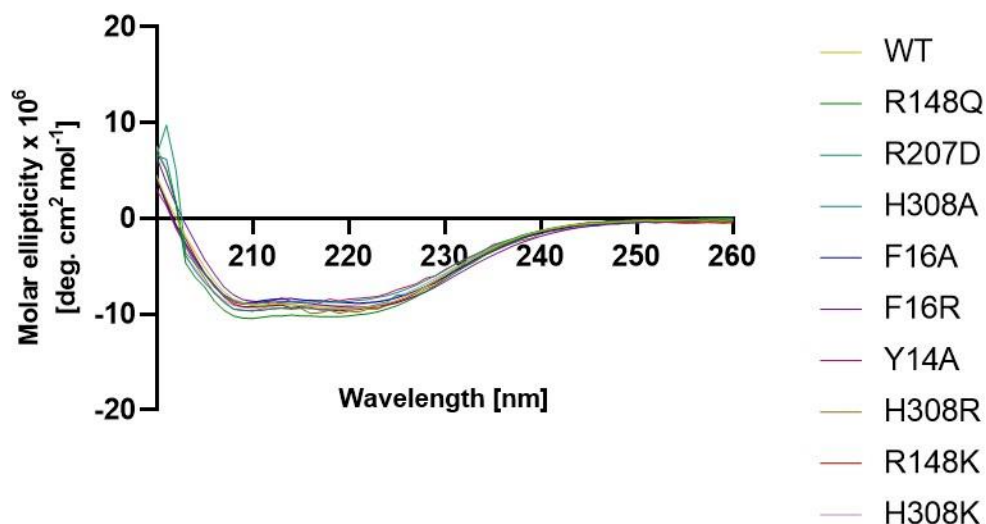

**Figure S6.** Far-UV-ECD spectroscopy of wild-type CsaB and the R148Q, R207D, H308A, K328R, F16A, F16R, Y14A, H308R, and R148K CsaB variants, showing identical curve shapes indicative of retention of the native secondary structure in the variants.

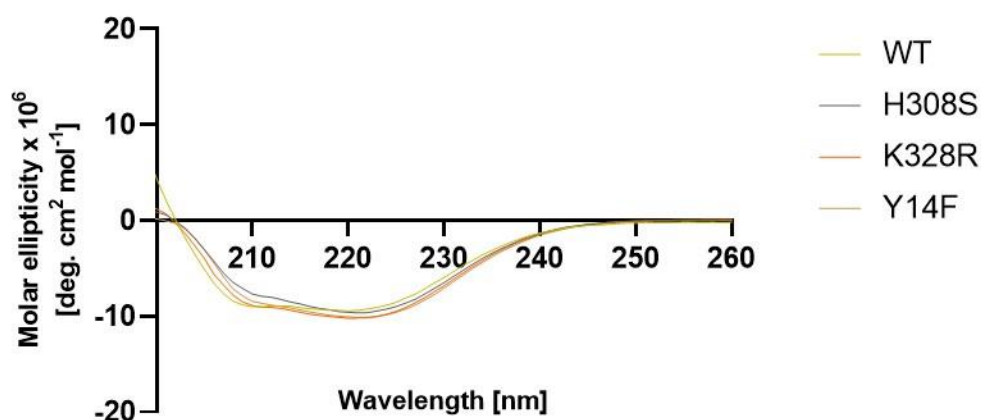

**Figure S7.** Far-UV-ECD spectroscopy of the Y14F, H308S and K328R variants compared to wild-type CsaB, showing a slightly different curve shape of the variants putatively pinpointing differences in the secondary structure.



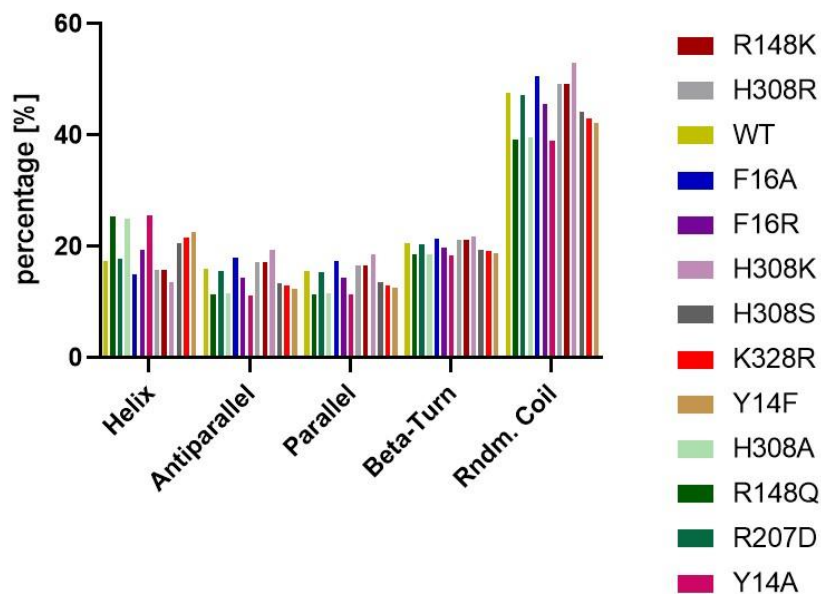

**Figure S8.** Calculated percentages of secondary structure elements of CsaB wild-type and CsaB variants using CDNN between 210-280nm. CDNN was calculated using the Chirascan software.

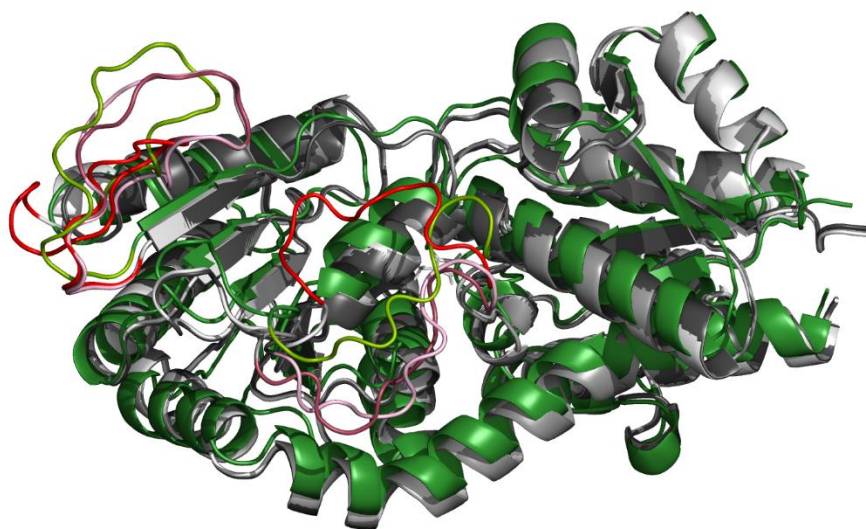

**Figure S9.** Overlay of AlphaFold models of the CsaB variants Y14F (gray 30), H308S (gray 60) and K328R (gray 90) showing differences in loop regions between residues 180-193 (“loop 2”; in the centre of the proteins) and residues 260-278, compared to wild-type CsaB (green). The loop regions of Y14F, H308S, K328R and wild-type CsaB are shown in light pink, raspberry, red and splitpea, respectively. The confidentiality of the loop regions is below 90 pLDDT. (Note that upon colouring of the loop regions, the confidentiality colouring of the AlphaFold models is removed.) The CsaB protein structure was visualized by PyMoL (Open Source Version 2.4; <https://github.com/schrodinger/pymol-open-source>).

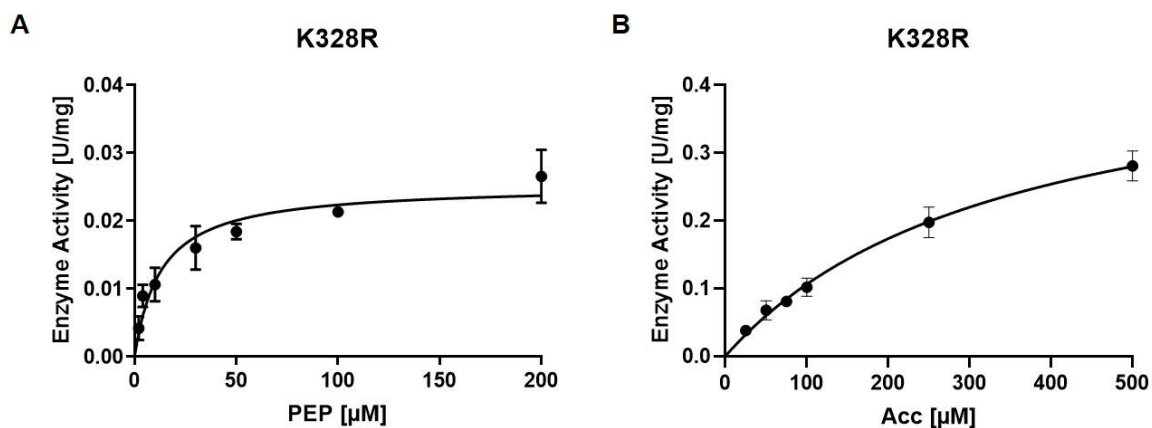

**Figure S10.** Kinetic analysis of K328R CsaB variant activity revealing  $K_M$  and  $k_{cat}$ . Direct Michaelis–Menten plot for varying PEP concentration (A) and upon variation of the acceptor (B). GraphPad Prism (version 9.1.2; GraphPad, San Diego, CA, USA) was used for statistical analysis, where  $K_M$  and  $V_{max}$  values were calculated by non-linear least-square regression to the direct Michaelis–Menten plot.

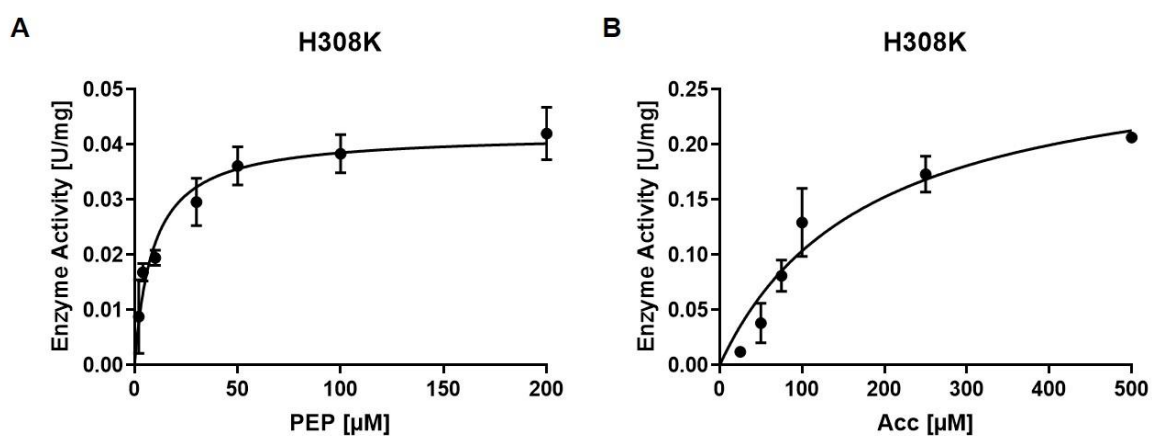

**Figure S11.** Kinetic analysis of H308K CsaB variant activity revealing  $K_M$  and  $k_{cat}$ . Direct Michaelis–Menten plot for varying PEP concentration (A) and upon variation of the acceptor (B). GraphPad Prism (version 9.1.2; GraphPad, San Diego, CA, USA) was used for statistical analysis, where  $K_M$  and  $V_{max}$  values were calculated by non-linear least-square regression to the direct Michaelis–Menten plot.

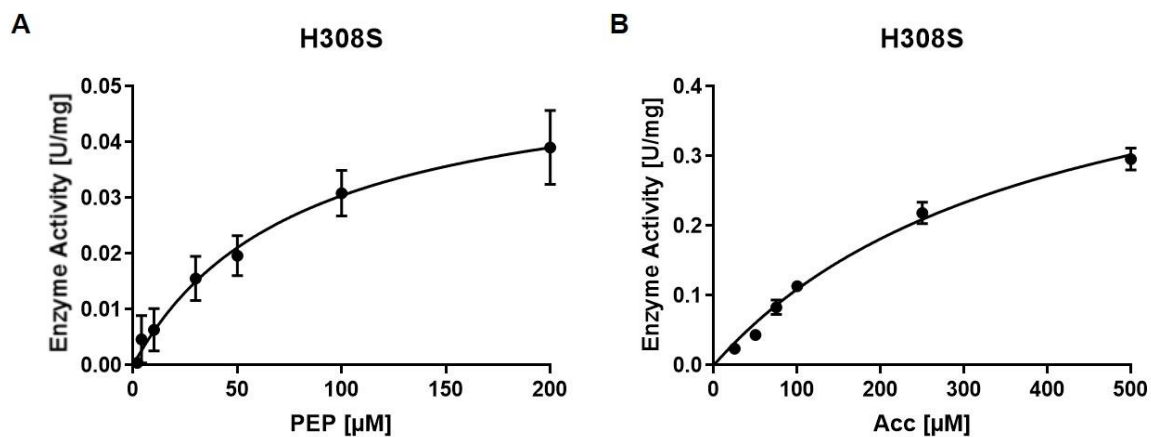

**Figure S12.** Kinetic analysis of H308S CsaB variant activity revealing  $K_M$  and  $k_{cat}$ . Direct Michaelis–Menten plot for varying PEP concentration (**A**) and upon variation of the acceptor (**B**). GraphPad Prism (version 9.1.2; GraphPad, San Diego, CA, USA) was used for statistical analysis, where  $K_M$  and  $V_{max}$  values were calculated by non-linear least-square regression to the direct Michaelis–Menten plot.

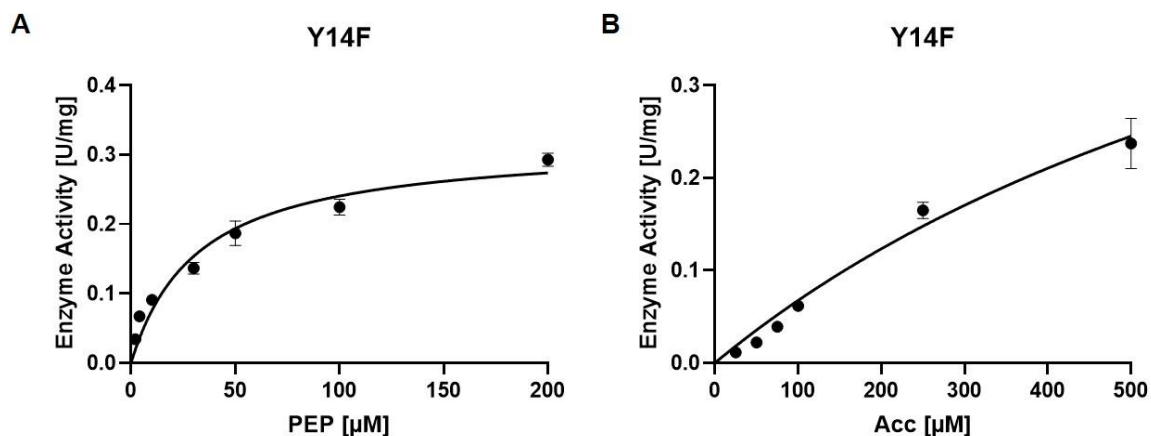

**Figure S13.** Kinetic analysis of Y14F CsaB variant activity revealing  $K_M$  and  $k_{cat}$ . Direct Michaelis–Menten plot for varying PEP concentration (**A**) and upon variation of the acceptor (**B**). GraphPad Prism (version 9.1.2; GraphPad, San Diego, CA, USA) was used for statistical analysis, where  $K_M$  and  $V_{max}$  values were calculated by non-linear least-square regression to the direct Michaelis–Menten plot.

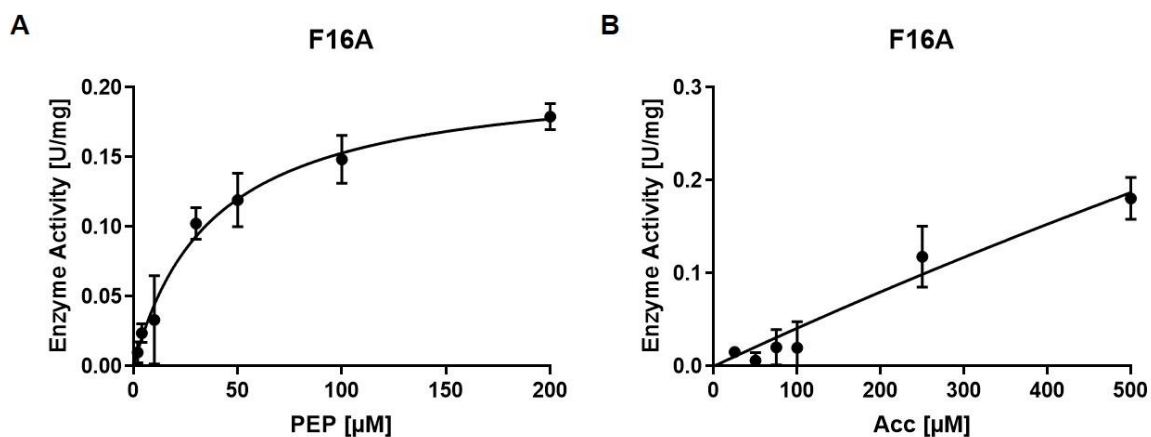

**Figure S14** Kinetic analysis of F16A CsaB variant activity revealing  $K_M$  and  $k_{cat}$ . Direct Michaelis–Menten plot for varying PEP concentration (A) and upon variation of the acceptor (B). GraphPad Prism (version 9.1.2; GraphPad, San Diego, CA, USA) was used for statistical analysis, where  $K_M$  and  $V_{max}$  values were calculated by non-linear least-square regression to the direct Michaelis–Menten plot.

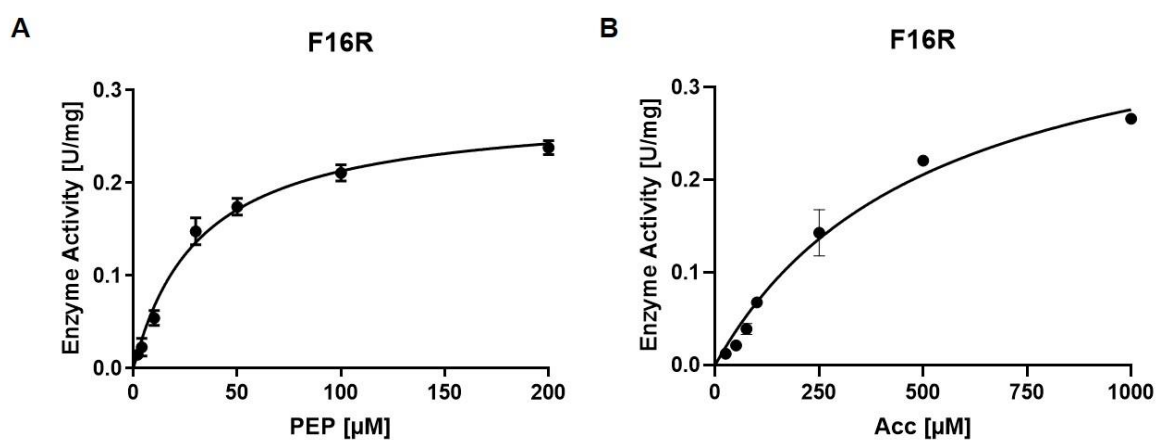

**Figure S15.** Kinetic analysis of F16R CsaB variant activity revealing  $K_M$  and  $k_{cat}$ . Direct Michaelis–Menten plot for varying PEP concentration (A) and upon variation of the acceptor (B). GraphPad Prism (version 9.1.2; GraphPad, San Diego, CA, USA) was used for statistical analysis, where  $K_M$  and  $V_{max}$  values were calculated by non-linear least-square regression to the direct Michaelis–Menten plot.

## References

- 1 Breslmayr, E. pHmap - A tool for automatized calculation and visualization of protein surface charge pH-profiles. *Zenodo* **v1.2**, doi:10.5281/zenodo.4751499 (2021).
- 2 Jurrus, E. *et al.* Improvements to the APBS biomolecular solvation software suite. *Protein Sci.* **27**, 112-128, doi:10.1002/pro.3280 (2018).
- 3 Higuchi, Y. *et al.* A rationally engineered yeast pyruvyltransferase Pvg1p introduces sialylation-like properties in neo-human-type complex oligosaccharide. *Sci. Rep.* **6**, 26349, doi:10.1038/srep26349 (2016).

Original images (SDS-PAGE gels) for assembly of Supplementary Figure S5

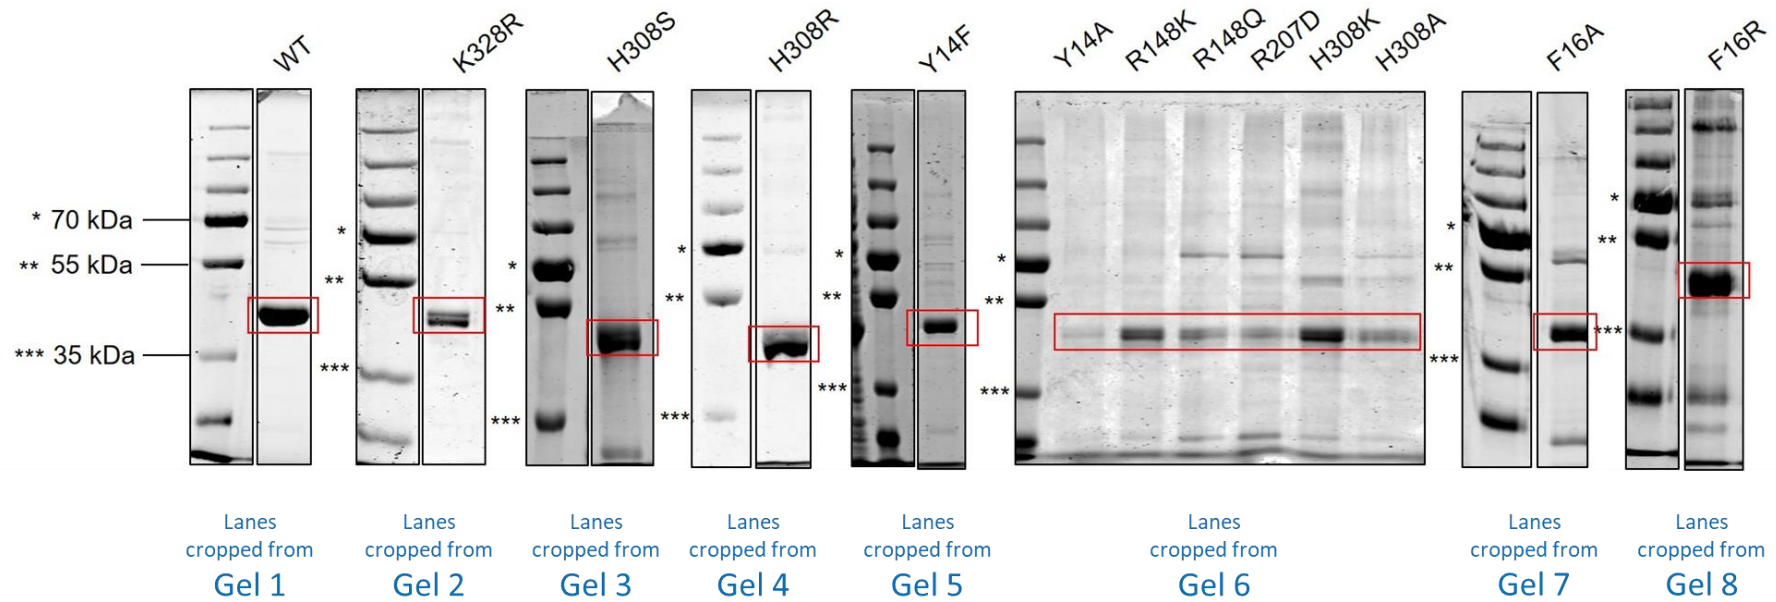

*Cropping is detailed for each Coomassie-stained SDS-PAGE gel on the next pages.  
Lanes cropped in the gels are shown inside black, broken frames.*

Cropped lanes ←

SDS-PAGE gel 1, original image

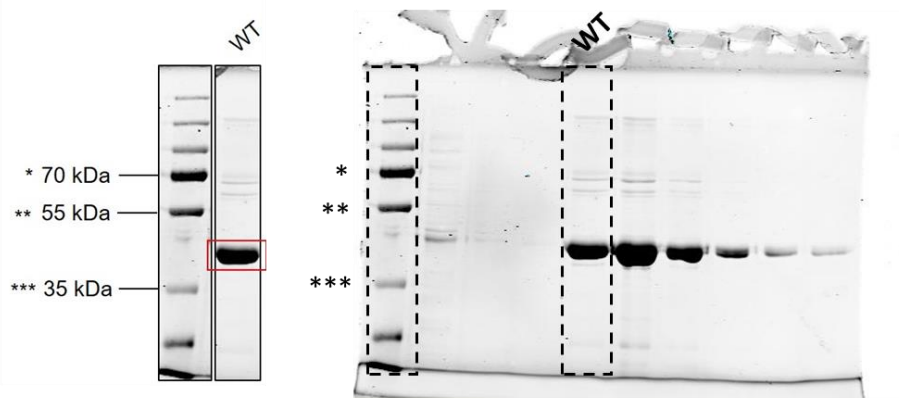

Cropped lanes ←

SDS-PAGE gel 2, original image

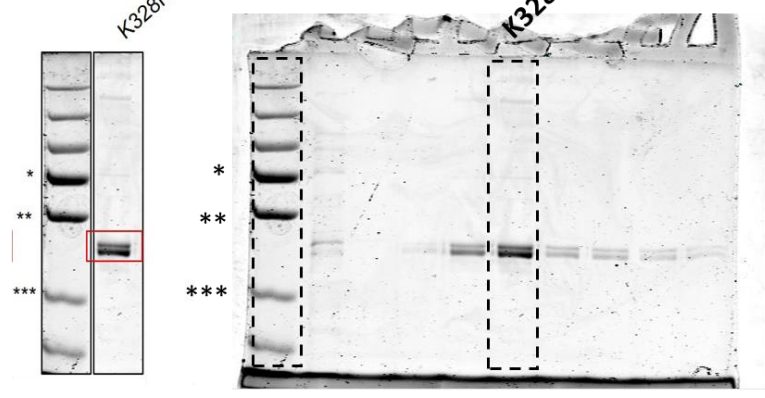

Cropped lanes ←

SDS-PAGE gel 3, original image

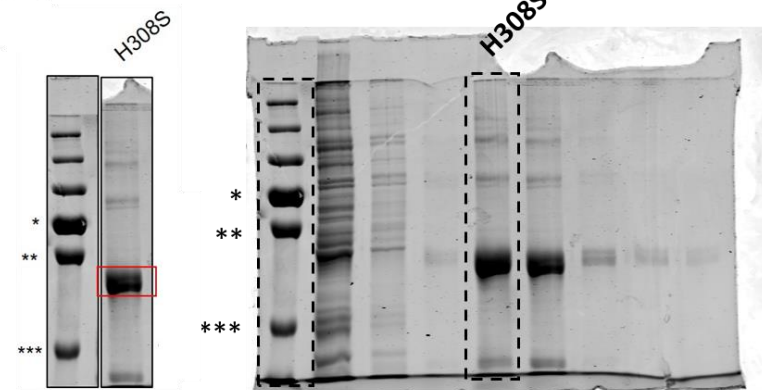

Cropped lanes ←

SDS-PAGE gel 4, original image

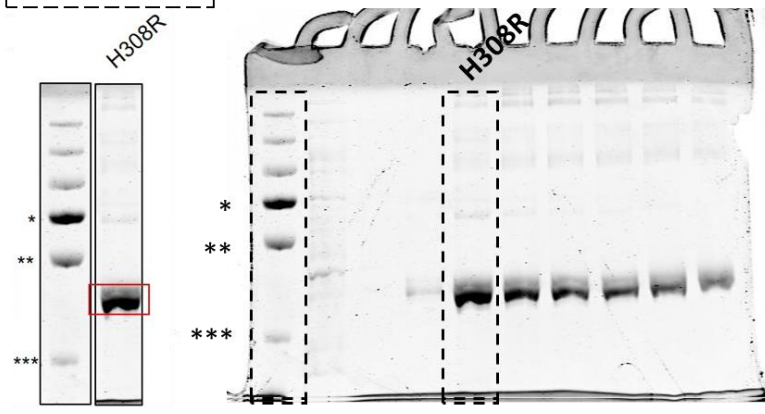

Cropped lanes ← SDS-PAGE gel 5, original image

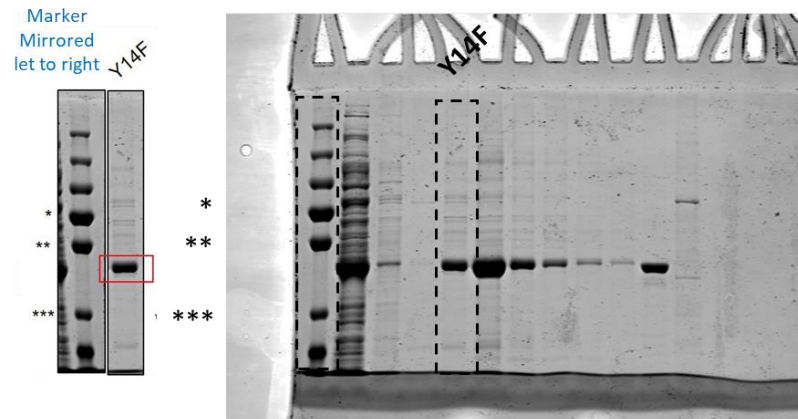

Cropped lanes ← SDS-PAGE gel 6, original image

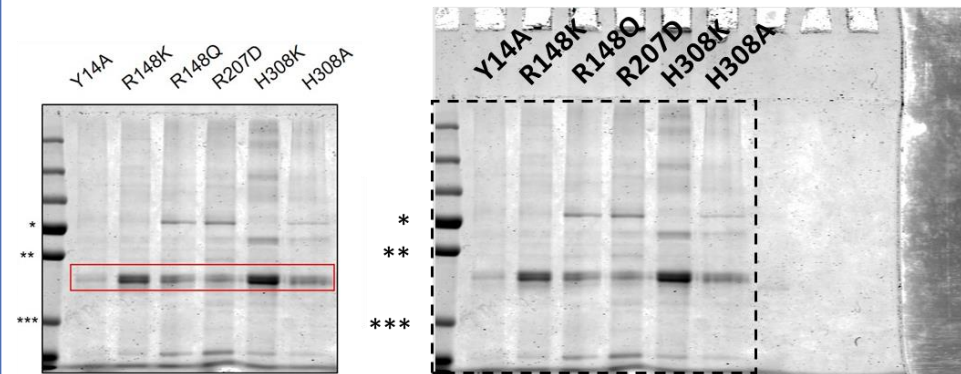

Cropped lanes ← SDS-PAGE gel 7, original image

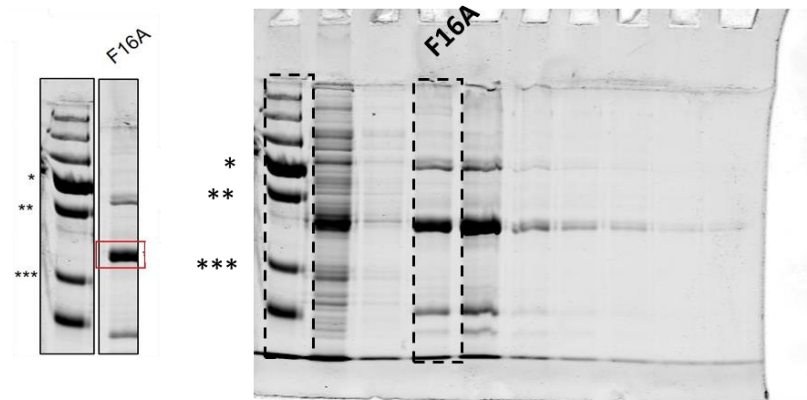

Cropped lanes ← SDS-PAGE gel 8, original image

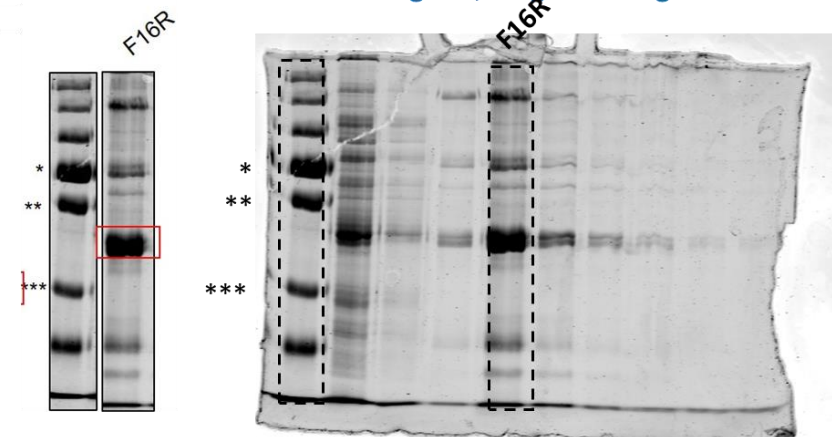



**SDS-PAGE gels without explanations**

**Gel 1**

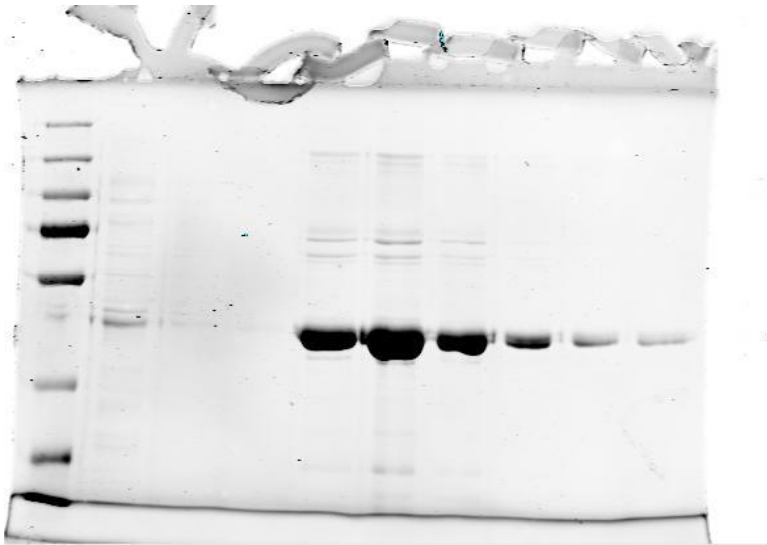

**Gel 2**

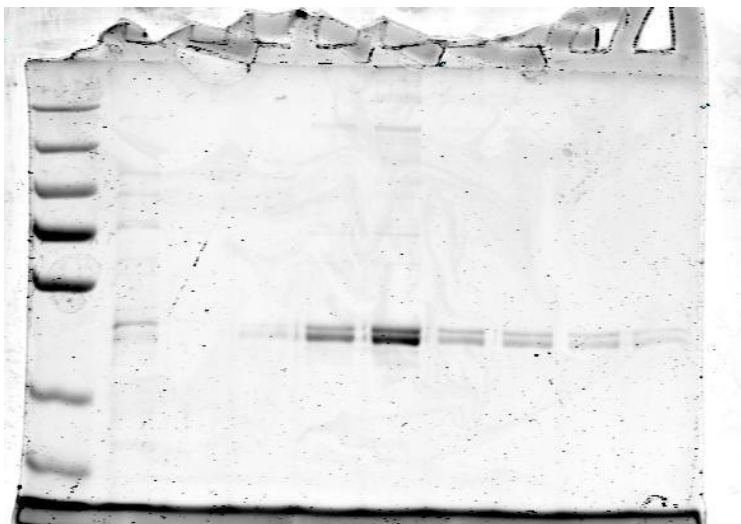

**Gel 3**

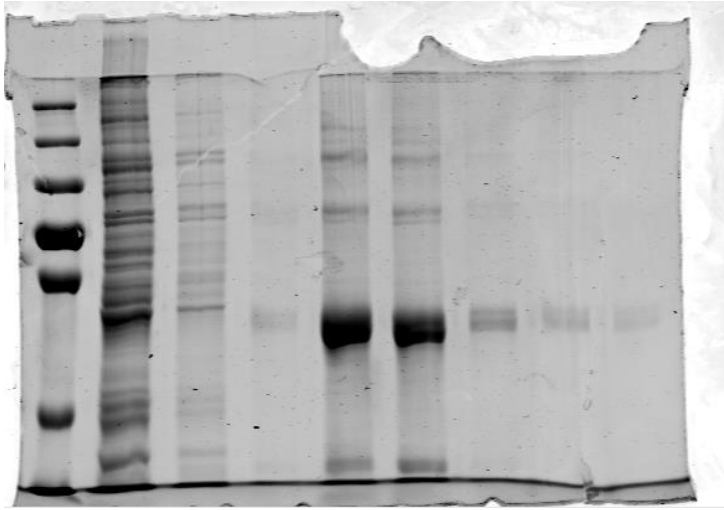

**Gel 4**

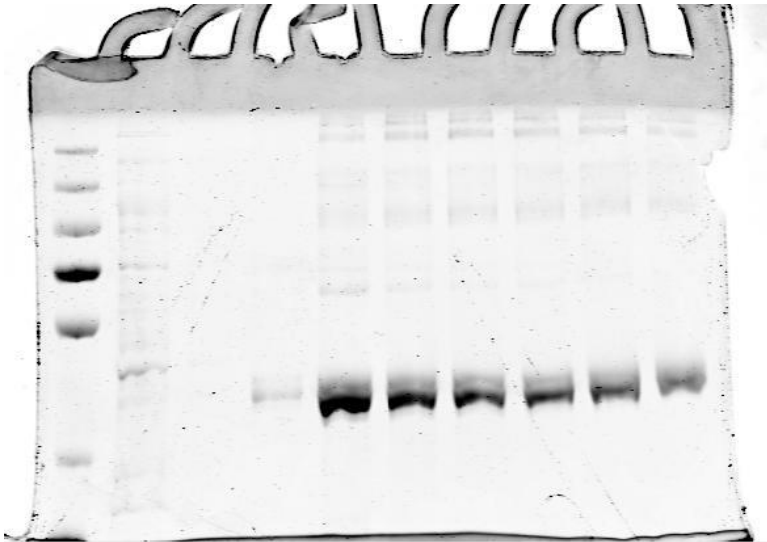

**Gel 5**

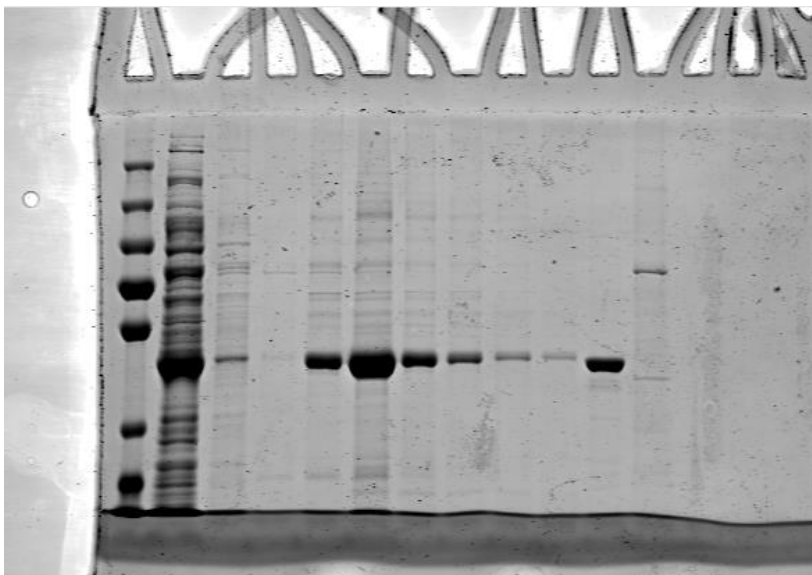

**Gel 6**

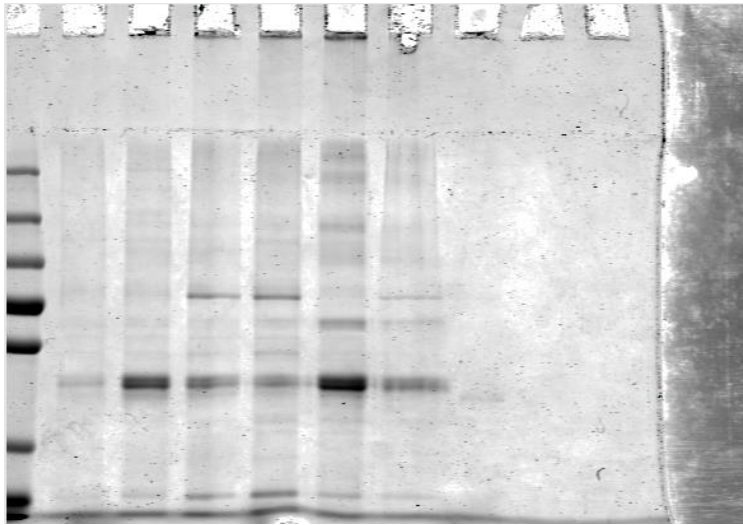

**Gel 7**

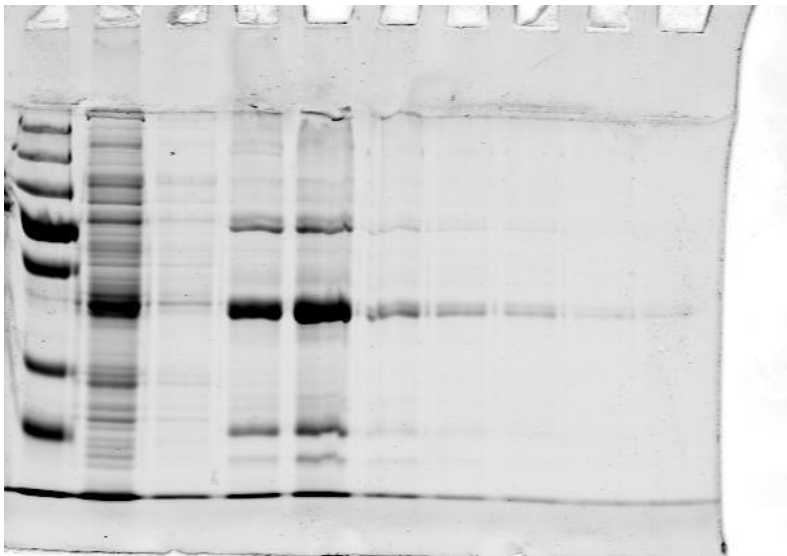

**Gel 8**

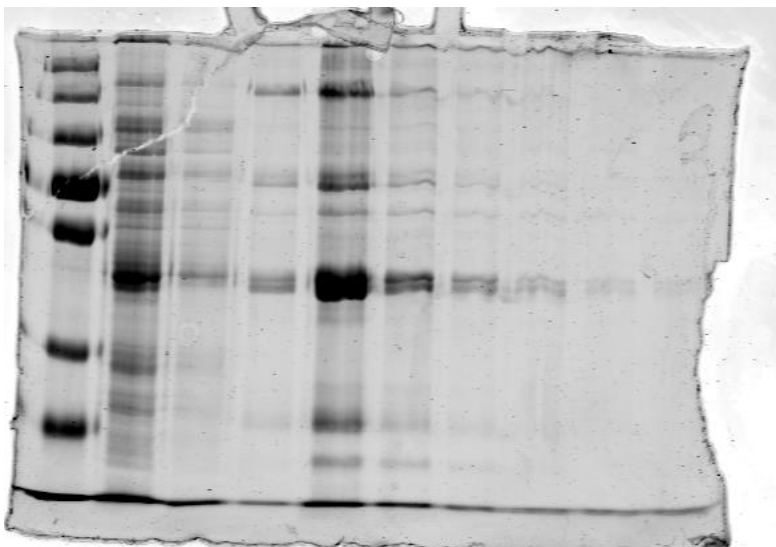

Supplement: 41598_2023_40072_MOESM1_ESM.pdf [file 41598_2023_40072_MOESM1_ESM.pdf]
